# Supplementary material
Source: publisher figshare collection journal article supplement (https://acs.figshare.com/ndownloader/files/4207111)
Supplement: Supplementary file 1 [file 4207111]

# Comparative study of random and oriented antibody immobilization as measured by dual polarization interferometry and surface plasmon resonance spectroscopy

*Hong Yan SONG, Donna ZHOU, Jonathan HOBLEY, Xiao Di SU\**

Institute of Materials Research and Engineering, A\*STAR, 3 Research Link, Singapore 117602

xd-su@imre.a-star.edu.sg

## **Supporting Information**

**RECEIVED DATE** (to be automatically inserted after your manuscript is accepted if required  
according to the journal that you are submitting your paper to)

## Preparation of Biotinylated Ab<sub>1</sub> (Ab<sub>1</sub>-b)

PSA antibody (Ab<sub>1</sub>) was diluted to 1 mg/ml in 50  $\mu$ l of PBS (with 10% 1M sodium bicarbonate in H<sub>2</sub>O). Immediately before use, 10 mM NHS-LC-Biotin in DMSO (4.5 mg/ml) was prepared. NHS-LC-Biotin (0.2  $\mu$ l, ~5 times of Ab<sub>1</sub> in molar ratio) was added to the Ab<sub>1</sub> solution, and the mixture was incubated at room temperature for 30 min. Gel filtration was used to purify the obtained Ab<sub>1</sub>-b.

## DPI measurement of repeated cycle of Ab<sub>1</sub> immobilization on protein G and detection of PSA

Figure S-1 shows DPI measurement of Ab<sub>1</sub> immobilization on protein G surface, sandwiched PSA detection and surface regeneration in real time. The measurement was illustrated in resolved mass and thickness. When the protein G layer was stabilized (curve not shown in this figure), Ab<sub>1</sub> was injected. At the end of 30 min rinsing, PSA (10 pg/ml) was injected, followed by secondary antibody (Ab<sub>2</sub>). The binding of PSA/Abs can be seen from the signal increase after Ab<sub>2</sub> injection. Once the detection was complete, the glycine solution was flowed through. The baseline returned back to its original position before Ab<sub>1</sub> was immobilized, indicating that the Ab<sub>1</sub>/PSA/Ab<sub>2</sub> complex was completely removed. The freshly regenerated protein G surface can immobilize the same amount of Ab<sub>1</sub>, and detect PSA/Ab<sub>2</sub> with repeated results.

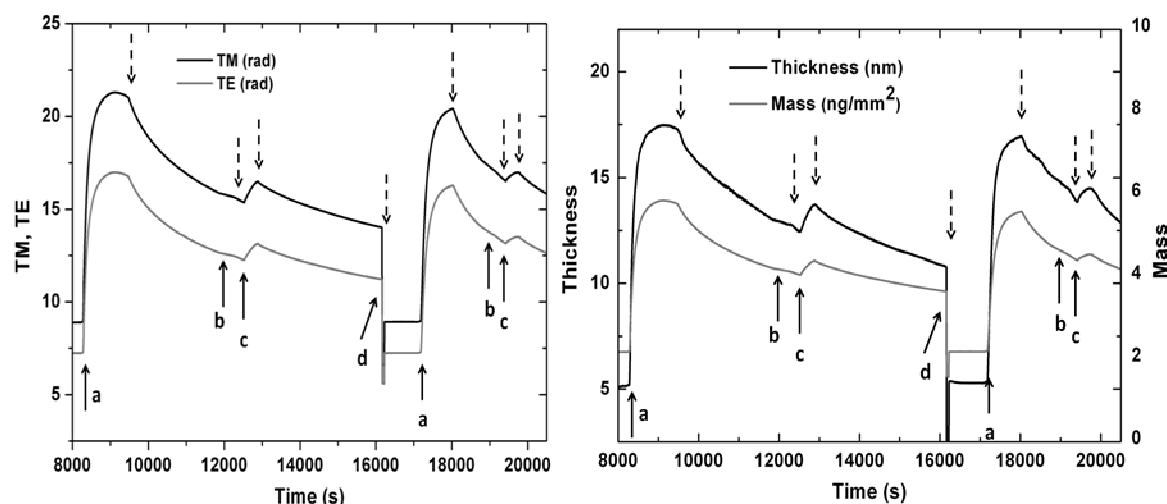

**Figure S-1.** Two cycles of immobilization of Ab<sub>1</sub> onto protein G surface followed by PSA detection using Ab<sub>1</sub>/PSA/Ab<sub>2</sub> sandwich complex. Original data (TM and TE) and the resolved layer thickness and

mass were recorded. a. Ab<sub>1</sub> (200 nM); b, PSA (10 pg/ml); c, Ab<sub>2</sub> (5 µg/ml); d, Glycine (1M, pH 2). The start and end point of each injection are indicated by a solid and broken arrow.

### SPR detection of PSA in ng/ml level using immobilized Ab<sub>1</sub> without orientation control

Figure S-2 shows SPR measurement of the Ab<sub>2</sub> signal following PSA addition (10 and 100 ng/ml) on the randomly immobilized Ab<sub>1</sub>.

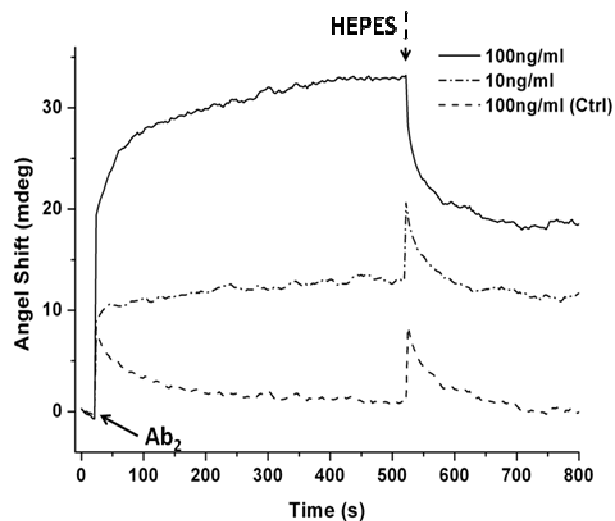

**Figure S-2.** SPR sensorgram of Ab<sub>2</sub> (10 µg/ml) following PSA injection (100 ng/ml and 10 ng/ml) on random immobilized Ab<sub>1</sub>. Control, no injection of Ab<sub>1</sub> on the surface (PSA 100 ng/ml).
